# Supplementary material
Source: PubMed Central journal article supplement (PMC5957775)
Supplement: NIHMS931954-supplement-supplement_1.pdf [file NIHMS931954-supplement-supplement_1.pdf]

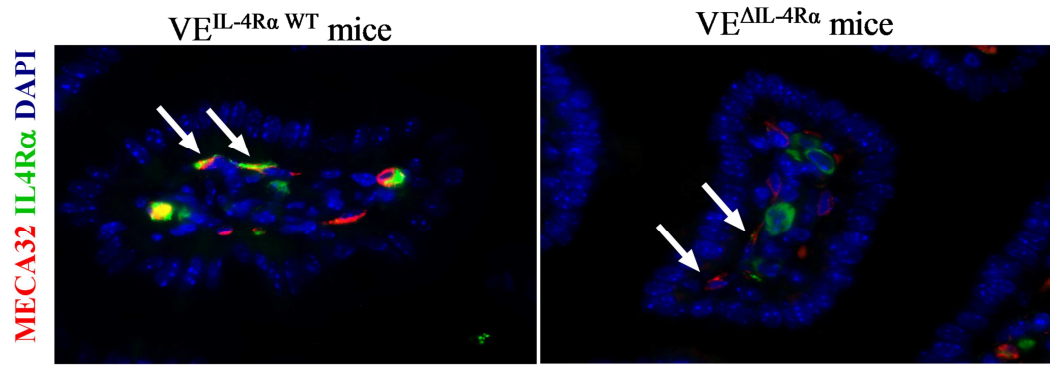

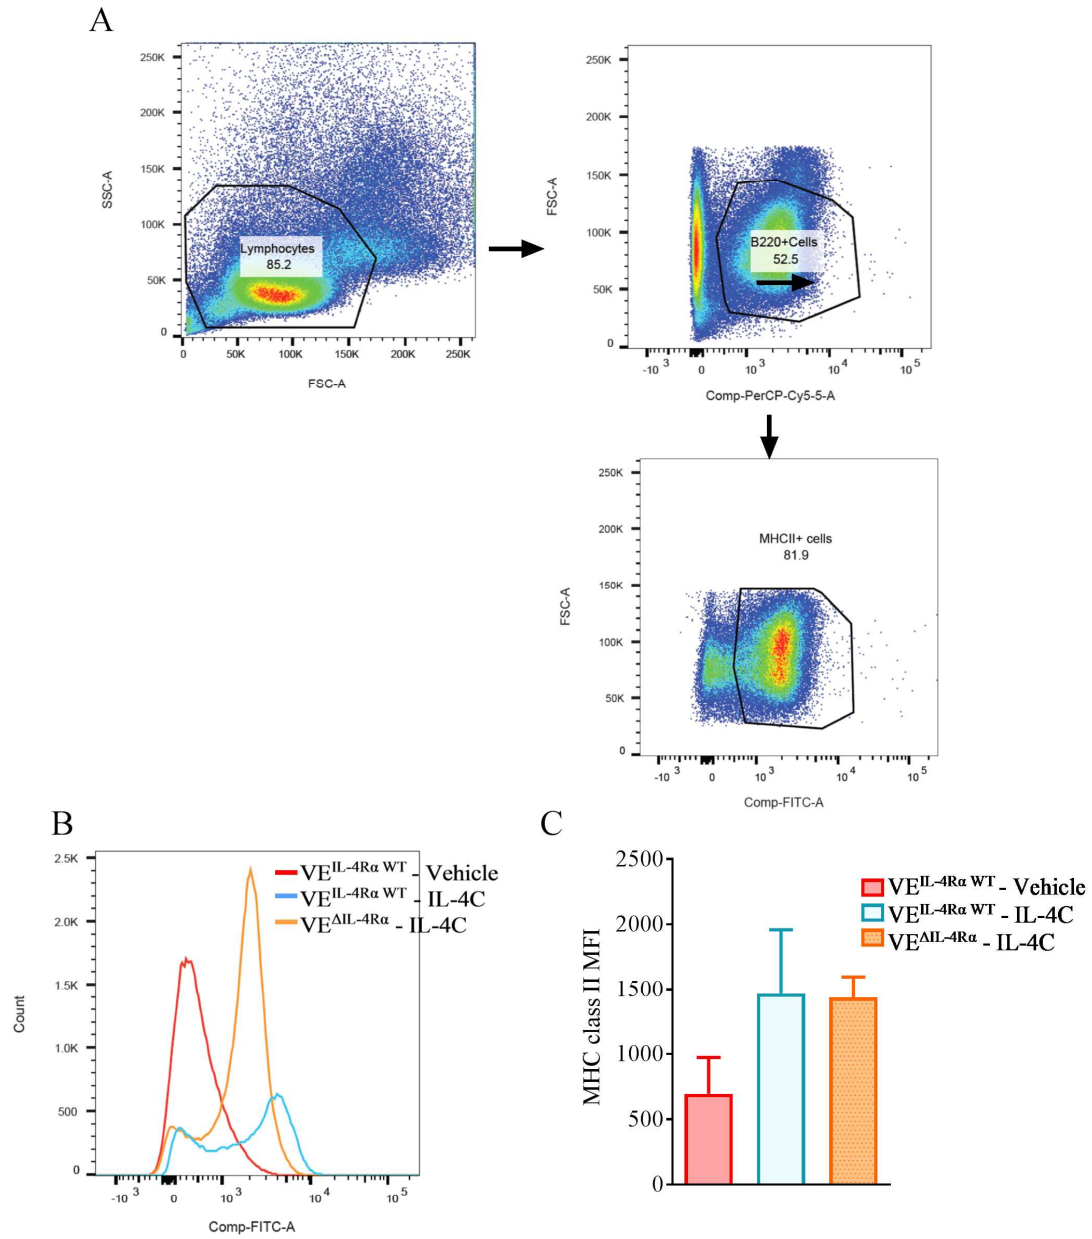

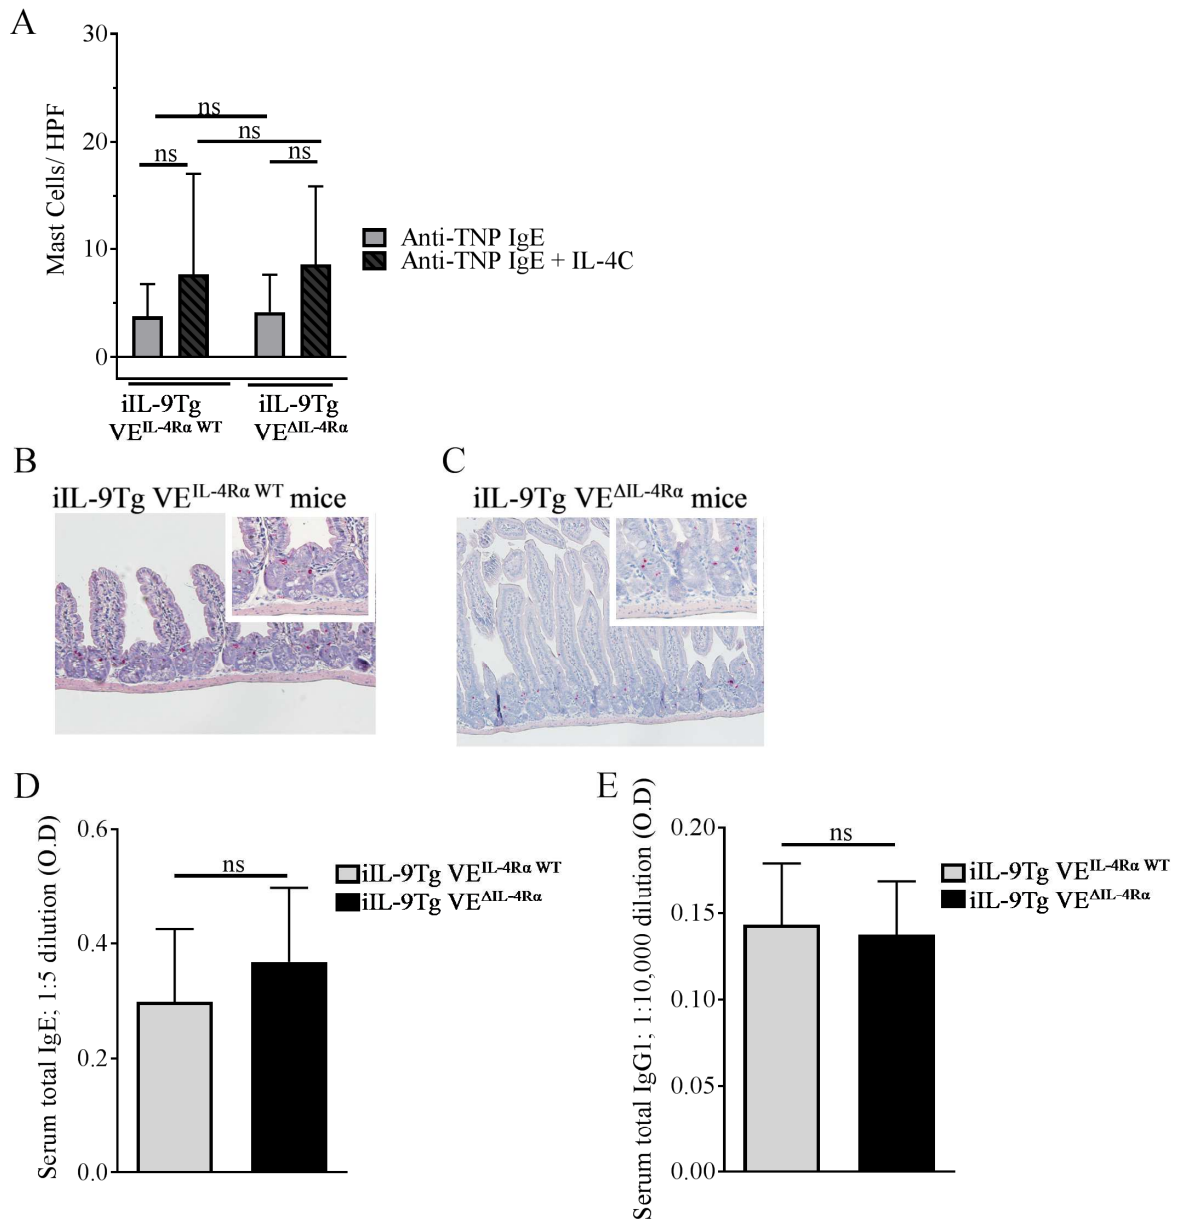

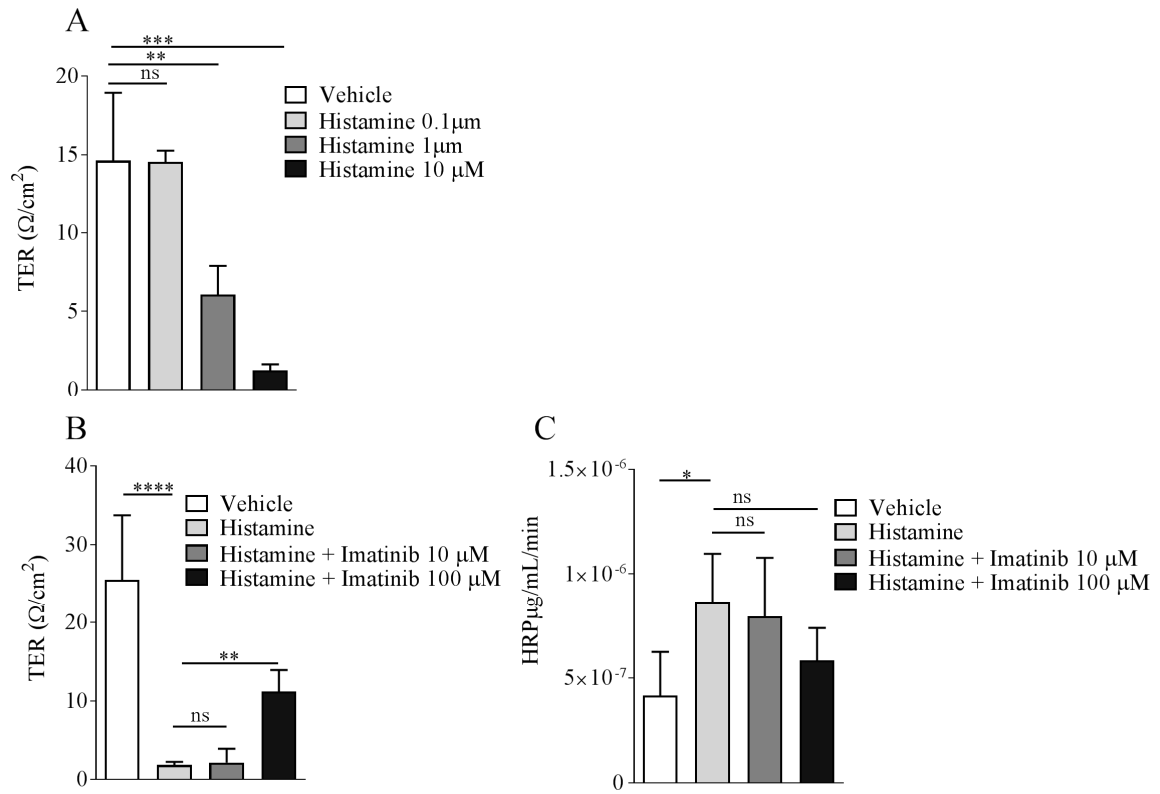

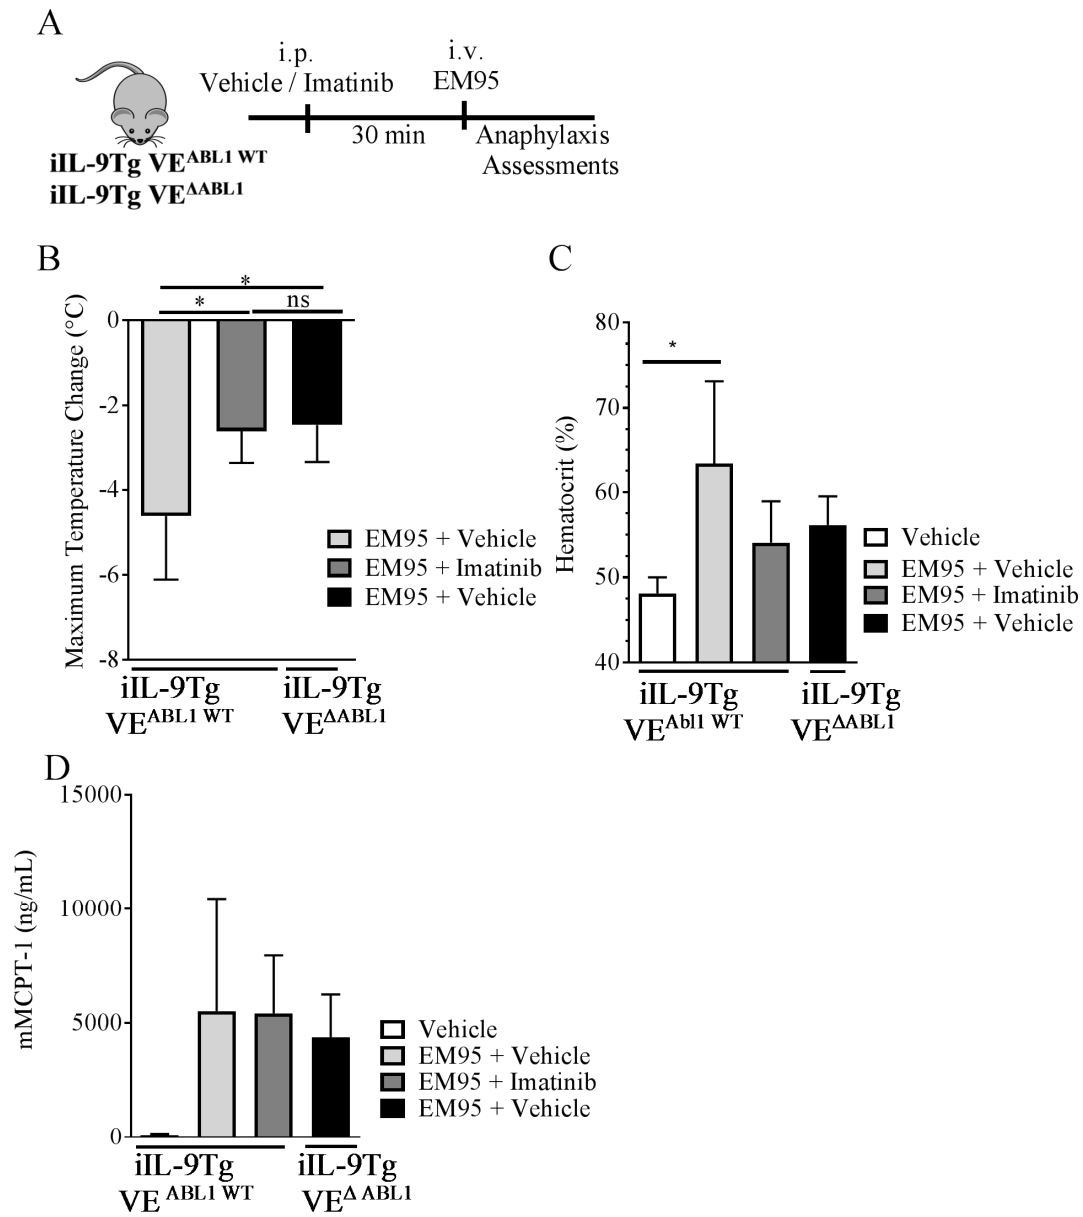

**Supplemental Figure Legends****Figure S1: VE<sup>ΔIL-4Rα</sup> mice lack the expression of IL-4Rα chain on VE cells.**

Immunofluorescence images of jejunum from VE IL-4Rα<sup>WT</sup> and VE<sup>ΔIL-4Rα</sup> mice. Anti- Panendothelial Cell Antigen staining with anti-rat monoclonal PLVAP antibody (MECA32) (red) identifies endothelial cells; anti-IL-4Rα staining (shown in green) was performed with anti-IL-4Rα (Santa Cruz, # sc-28361) and DAPI staining is shown in blue. White arrows show the presence of IL-4Rα chain staining on endothelial cells of VE IL-4Rα<sup>WT</sup> mice and its absence on endothelial cells of VE<sup>ΔIL-4Rα</sup> mice.

**Figure S2: IL-4C is biologically active in the VE<sup>ΔIL-4Rα</sup> mice.**

Representative flow plots show the gating of the B220/MHC II population from lymphocytes (A). Histogram (B). Median fluorescence intensity (MFI) of FITC on PerCp/Cy5.5+ cells determined by flow cytometry (C). VE<sup>IL-4Rα WT</sup> and VE<sup>ΔIL-4Rα</sup> mice were injected i.v. with vehicle or IL-4C (1 μg of IL-4 + 5 μg anti-IL-4 mAb). Mice were sacrificed the next day, and spleen cells were stained with anti-mouse MHC II (I-A), FITC, and anti-mouse/human CD45R/B220 PerCP/Cy5.5<sup>+</sup> antibody. Data are represented as the mean ± SD; = 2 mice per group from n = 1 experiment.

**Figure S3: The effect of vascular endothelial IL-4Rα chain on hypovolemic shock is mast cell and immunoglobulin independent.**

Intestinal MC counts (A), photomicrograph of CAE-stained intestinal section of iIL-9Tg VE<sup>IL-4Rα WT</sup> (B) and iIL-9Tg VE<sup>ΔIL-4Rα</sup> (C), serum Total serum IgE (D). Total serum IgG1 (E) of iIL-9Tg VE<sup>IL-4Rα WT</sup> and iIL-9Tg VE<sup>ΔIL-4Rα</sup> mice following treatment with anti-TNP IgE and with IL-4C or vehicle and with TNP-OVA. Serum was collected from untreated iIL-9Tg VE<sup>IL-4Rα WT</sup> and iIL-9Tg VE<sup>ΔIL-4Rα</sup> mice. Data are represented as the as the mean ± SD; n = 4-5 mice per group (A, D-E). Photomicrograph 10X magnification; insert, 40X magnifications (B-C). ns > 0.05.

**Figure S4: Histamine-induced VE-permeability in EA.hy926 cells is inhibited by Imatinib.**

(A) Confluent monolayers of cell line EA.hy 296 (EVOM >100 ohms) were mounted in Ussing chambers and stimulated with different doses of histamine (0.1 – 10 μM) for 30 min and TER was determined using Ohms law. EA.hy 296 cells were pretreated with different dose of imatinib (0 – 100 μM) for 3 h, mounted in Ussing Chambers and treated with histamine (100 μM for 30 min) and TER (B) and HRP flux (C) was determined. Data are represented as the as the mean ± SD; n = 3 wells per group. \*\*\*\* P < 0.0001, \*\*\* P < 0.001, \*\* P < 0.01, \* P < 0.05, ns > 0.05.

**Figure S5: Hypovolemic shock induced by EM95 is dependent on VE ABL1.**

Experimental regimen (A), Maximum temperature change (B), Hematocrit percentage (C), and mMCPT-1 (D) in iIL-9Tg VE<sup>ΔABL1</sup> (iIL-9<sup>WT</sup> Tie2<sup>cre</sup> ABL1<sup>fl/fl</sup>) and iIL-9Tg VE<sup>ABL1 WT</sup> (iIL-9<sup>WT</sup> Tie2<sup>WT</sup> Abl1<sup>fl/fl</sup>; used as a WT control.) i.p. treated

with vehicle or imatinib (1.25 mg/mice) 30 min before EM95 (i.v. 2 mg / 200 mL). iIL-9Tg VE<sup>ΔAbi1</sup> received EM95 only. Data are represented as the mean ± SD; n = 4-6 mice per group from n = 3 experiments. \* P < 0.05, ns > 0.05.

ACCEPTED MANUSCRIPT
